# Supplementary material for: A neutral branched platinum–acetylide complex possessing a tetraphenylethylene core: preparation of a luminescent organometallic gelator and its unexpected spectroscopic behaviour during sol-to-gel transition
Source: Royal Society of Chemistry journal article supplement (doi:10.1039/c5cc04789g), 2015-01-01
Supplement: c5cc04789g1.pdf [file c5cc04789g1.pdf]

*Supporting Information for*

**Neutral branched platinum-acetylide complex possessing a tetraphenylethylene core: preparation of luminescent organometallic gelator and its unexpected spectroscopic behaviour during sol-to-gel transition**

Yuan-Yuan Ren,<sup>a</sup> Nai-Wei Wu,<sup>a</sup> Junhai Huang,<sup>b</sup> Zheng Xu,<sup>c</sup>  
Dan-Dan Sun,<sup>a</sup> Cui-Hong Wang<sup>\*a</sup> and Lin Xu<sup>\*a</sup>

<sup>a</sup>*Shanghai Key Laboratory of Green Chemistry and Chemical Processes, School of Chemistry and Molecular Engineering, East China Normal University, 3663 N. Zhongshan Road, Shanghai, China. E-mail: lxu@chem.ecnu.edu.cn (L. X.)*

<sup>b</sup>*Zhangjiang Institute, China State Institute of Pharmaceutical Industry, 1599 Zhangheng Road, Shanghai, China.*

<sup>c</sup>*Chongqing Key Laboratory of Environmental Materials and Remediation Technology, Chongqing University of Arts and Sciences, 319 Honghe Avenue, Chongqing, China.*

## **Contents:**

1. General information
2. The synthesis of complex **TPA**
3. The AIEE behavior of complex **2** in CH<sub>2</sub>Cl<sub>2</sub>/*n*-hexane
4. Fluorescence spectra of complexes **2** and **TPA** in CH<sub>2</sub>Cl<sub>2</sub> and *n*-hexane
5. SEM images of xerogel of **TPA**
6. Concentration-dependent <sup>1</sup>H NMR spectra of **TPA**
7. Temperature-depended emission spectra of **TPA**
8. The emission spectra of **TPA** in different solvents
9. The normalized absorption spectra of **TPA** in CH<sub>2</sub>Cl<sub>2</sub>/*n*-hexane
10. The <sup>1</sup>H, <sup>31</sup>P, and <sup>13</sup>C NMR spectra of **TPA**
11. The partial <sup>31</sup>P NMR spectra of **2** and **TPA**
12. MALDI-TOF-MS of **TPA**
13. IR spectra of the xerogel **TPA**
14. X-ray diffraction diagrams of the xerogel **TPA**

## **1. General information**

All reagents were analytical reagents and used without further treatment. THF used were dried according to standard procedures and degassed under N<sub>2</sub> for 30 minutes. Column chromatography was conducted by using silica-gel column .

<sup>1</sup>H NMR, <sup>31</sup>P NMR and <sup>13</sup>C NMR spectra were recorded on Bruker 400 MHz Spectrometer (<sup>1</sup>H: 400 MHz; <sup>31</sup>P: 161.9 MHz; <sup>13</sup>C: 100 MHz) at 298 K. The <sup>1</sup>H and <sup>13</sup>C NMR chemical shifts were reported relative to residual solvent signals, and <sup>31</sup>P NMR resonances were referenced to an internal standard sample of 85% H<sub>3</sub>PO<sub>4</sub> (δ 0.0). Coupling constants (*J*) were denoted in Hz and chemical shifts (δ) in ppm. Multiplicities were denoted as follows: s = singlet, d = doublet, m = multiplet, br = broad. Fluorescence spectra were recorded on Varian Cary Eclipse.

## **2. The synthesis of complex TPA**

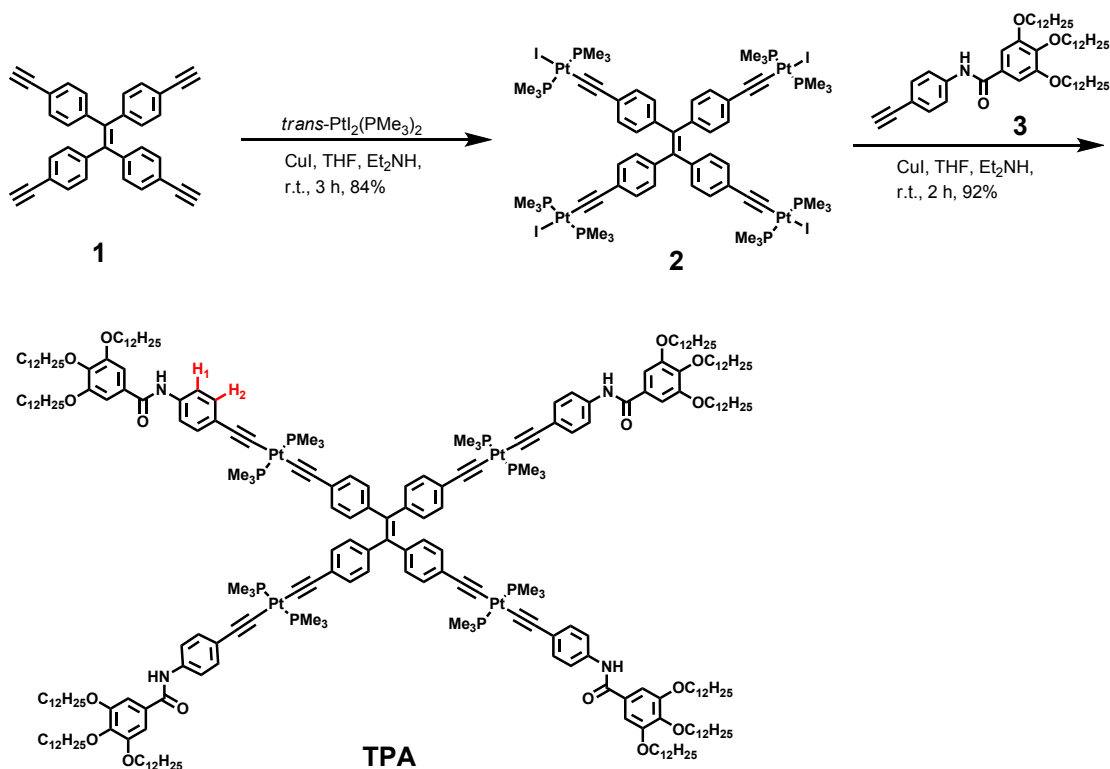

**Scheme S1** The synthesis of complex **TPA**.

**Compound 2:** A solution of *trans*-PtI<sub>2</sub>(PMe<sub>3</sub>)<sub>2</sub> (639 mg, 1.02 mmol) and CuI (4 mg, 10 mol%) in a mixture of THF/Et<sub>2</sub>NH (40 mL THF and 45 mL Et<sub>2</sub>NH) was stirred at room temperature. Then compound **1** (91 mg, 0.21 mmol) dissolved in THF was added dropwise to the reaction mixture under an atmosphere of nitrogen. The reaction was stirred at room temperature for 3 hours. The solvent was then removed in vacuo, the resulting residue was separated by column chromatography on silica gel and the yellow solid **2** was obtained (417 mg, 84%). <sup>1</sup>H NMR (CDCl<sub>3</sub>, 400 MHz): δ 7.02-7.04 (m, 9H), 6.85-6.83 (m, 9H), 1.80-1.78 ppm (m, 72H). <sup>31</sup>P NMR (CDCl<sub>3</sub>, 161.9 MHz): δ = -22.49 (s, J<sub>Pt-P</sub> = 1128.44 Hz). <sup>13</sup>C NMR (CDCl<sub>3</sub>, 100 MHz): δ 141.31, 139.98, 131.17, 130.10, 125.57, 99.77, 91.14, 90.99, 16.47, 16.26, 16.06, 15.86, 15.67. MALDI-MS: calcd for [M + H]<sup>+</sup>: 2320.96, found: 2320.08. HRMS (ESI): calcd for [M + 2Na]<sup>2+</sup>: 1182.9666, found: 1182.9639.

**Compound TPA:** A solution of compound **2** (150mg, 0.07 mmol) and CuI (2 mg, 10 mol%) in a mixture of THF/Et<sub>2</sub>NH (10 mL THF and 10

mL Et<sub>2</sub>NH) was stirred at room temperature. Then compound **3** (200 mg, 0.07 mmol) dissolved in THF was added dropwise to the reaction mixture under an atmosphere of nitrogen. The reaction was stirred at room temperature for 2 hours. The solvent was then removed in vacuo, the resulting residue was separated by column chromatography on silica gel and the yellow solid **TPA** was obtained (266 mg, 92%). <sup>1</sup>H NMR (CDCl<sub>3</sub>, 400 MHz): δ 7.63 (s, 4H), 7.48 (d, *J* = 8.4 Hz 8H), 7.20 (d, *J* = 7.6 Hz 8H), 7.02 (br, 17H), 6.84-6.82 (m, 8H), 4.03-4.01 (m, 24H), 1.80-1.78 (m, 96H), 1.47 (br, 24H), 1.26 (m, 216H), 0.90-0.86 (m, 36H). <sup>31</sup>P NMR (CDCl<sub>3</sub>, 161.9 MHz): δ = -20.21 (s, *J*<sub>Pt-P</sub> = 1148 Hz). <sup>13</sup>C NMR (CDCl<sub>3</sub>, 100 MHz): δ 165.38, 153.12, 141.46, 135.50, 131.65, 131.21, 130.48, 129.95, 119.72, 105.80, 73.51, 69.43, 31.88, 30.28, 29.61, 29.34, 26.04, 22.64, 15.60, 15.40, 15.21, 14.00. MALDI-MS: calcd for [M + H]<sup>+</sup>: 4905.84, found: 4905.80.

### 3. The AIEE behavior of complex **2** in CH<sub>2</sub>Cl<sub>2</sub>/*n*-hexane

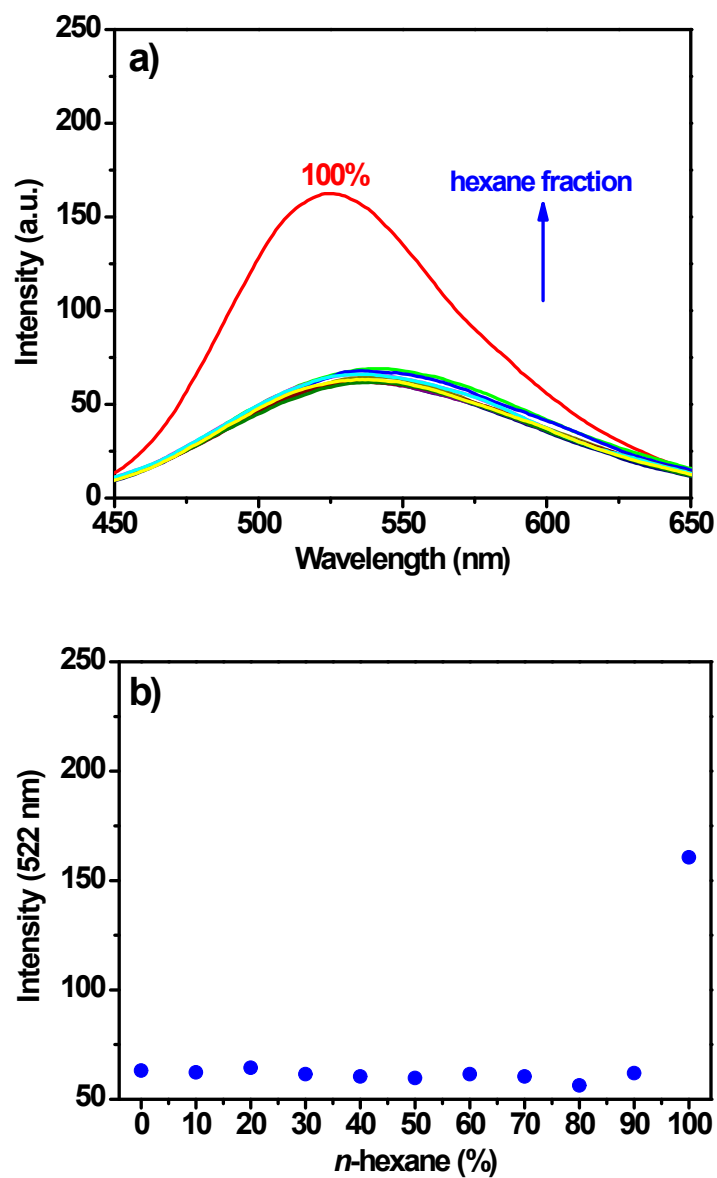

**Fig. S1** Fluorescence spectra (a) and fluorescence intensity at 522 nm (b) of complex 2 in the CH<sub>2</sub>Cl<sub>2</sub>/n-hexane mixtures with different n-hexane fractions.

#### 4. Fluorescence spectra of complexes 2 and TPA in CH<sub>2</sub>Cl<sub>2</sub> and n-

hexane

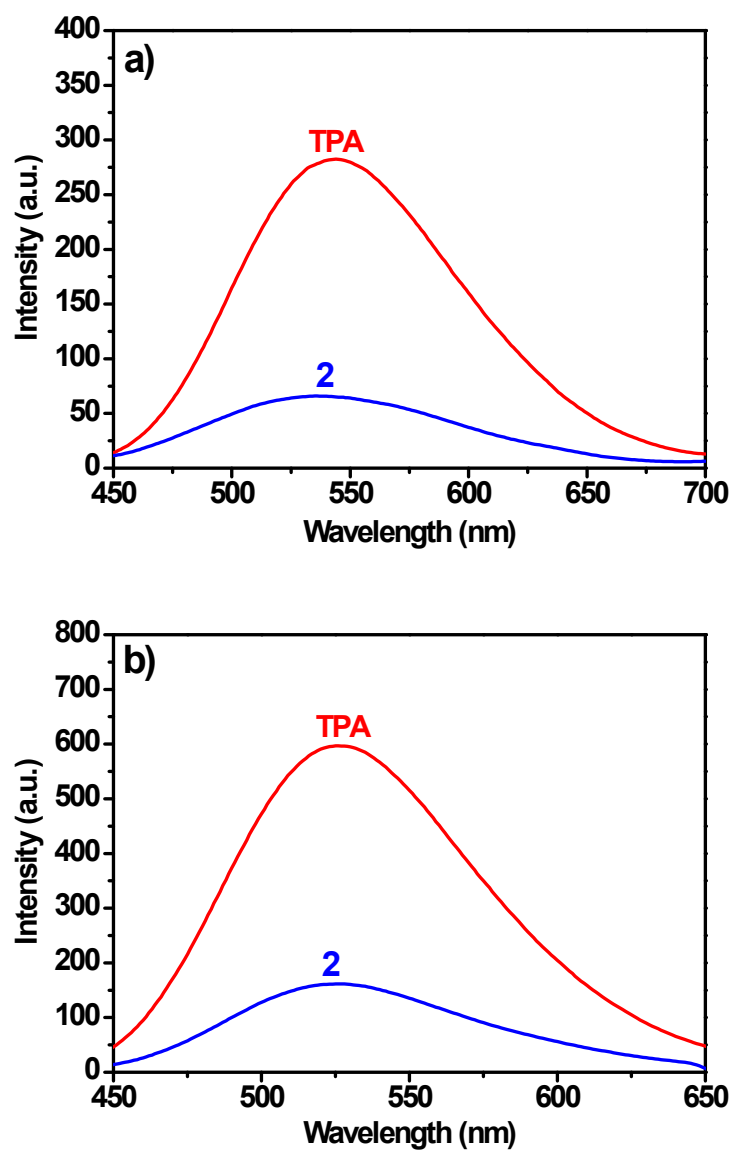

**Fig. S2** Fluorescence spectra of complexes **2** and **TPA** in  $\text{CH}_2\text{Cl}_2$  (a) and *n*-hexane (b).

## 5. SEM images of xerogel of TPA

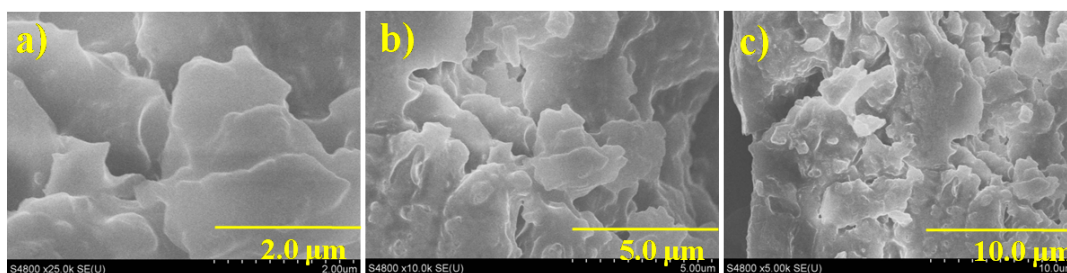

**Fig. S3** SEM images of xerogel of TPA in ethyl acetate.

## 6. Concentration-dependent $^1\text{H}$ NMR spectra of TPA

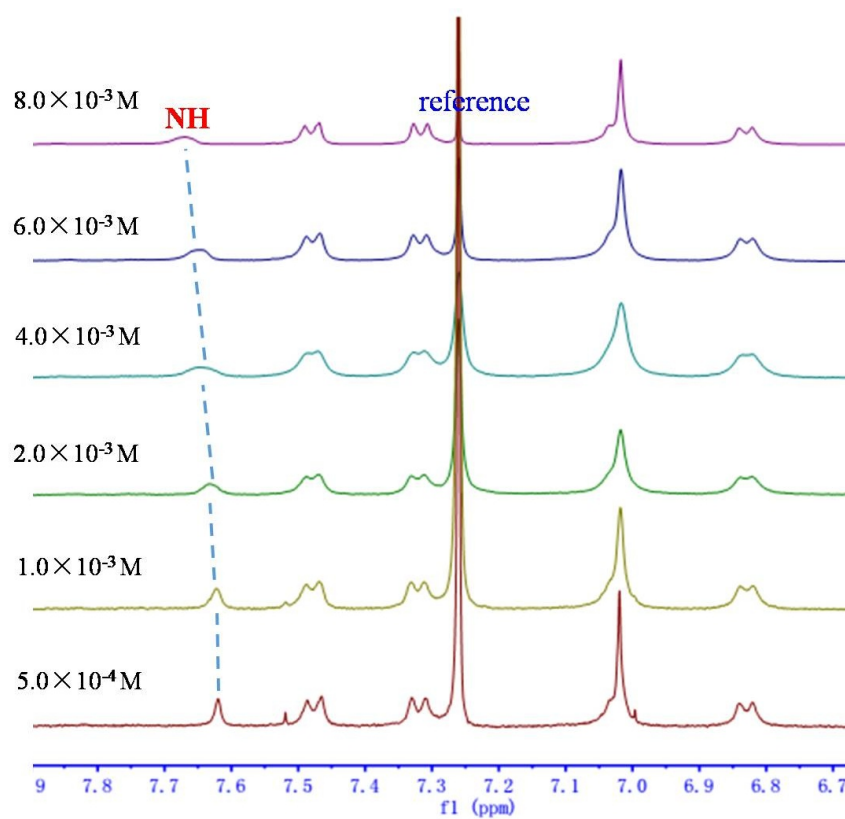

**Fig. S4** The  $^1\text{H}$  NMR spectra of TPA in  $\text{CDCl}_3$  with different concentrations.

## 7. Temperature-depended emission spectra of TPA



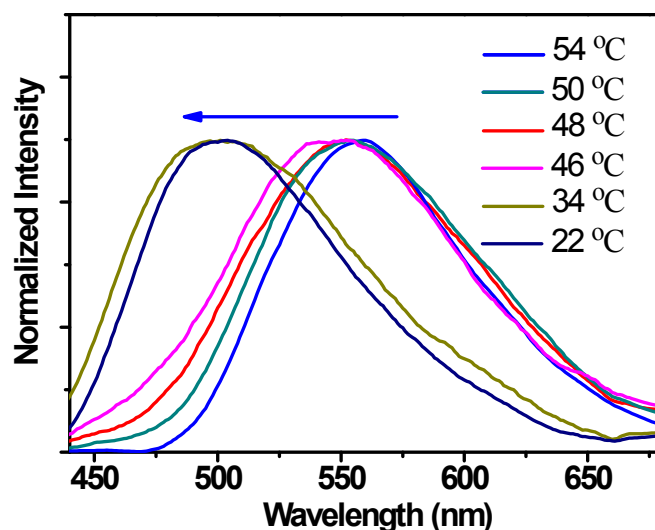

Fig. S5 The emission spectra of TPA in ethyl acetate with different temperatures.

### 8. The emission spectra of TPA in different solvents

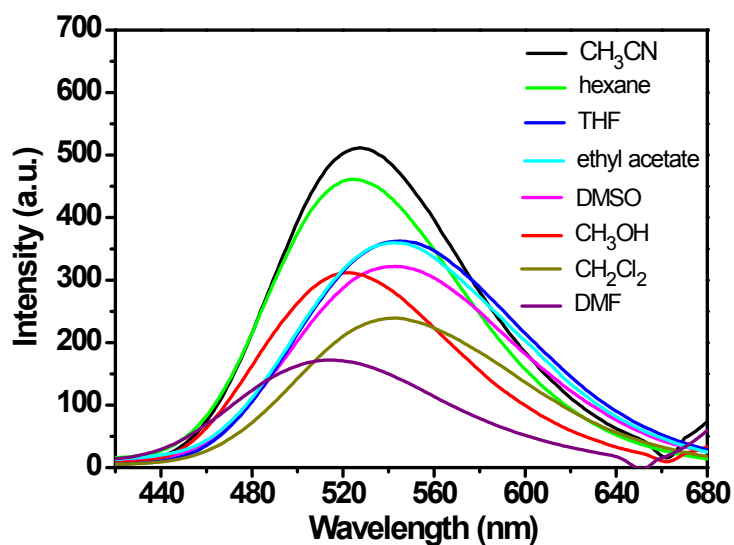

Fig. S6 The emission spectra of TPA in different solvents such as hexane, toluene, dichloromethane, tetrahydrofuran, ethyl acetate, acetonitrile, methanol, and dimethyl sulfoxide.

### 9. The normalized absorption spectra of TPA in $\text{CH}_2\text{Cl}_2/n$ -hexane

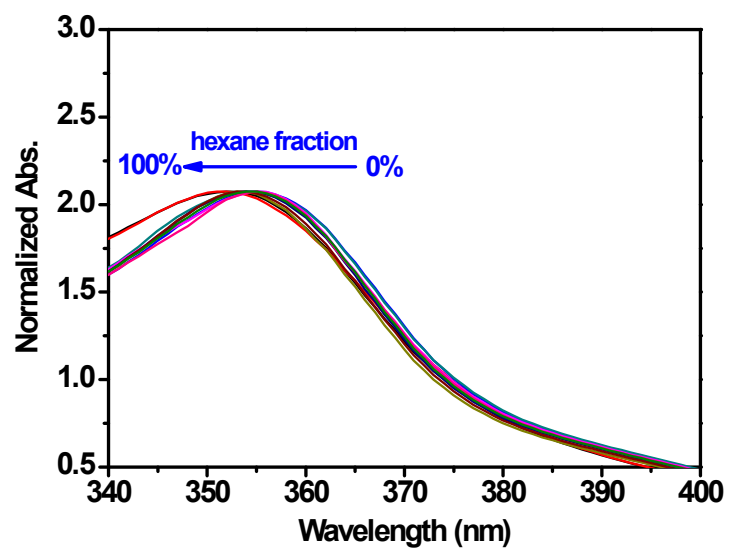

**Fig. S7** The normalized absorption spectra of TPA in the  $\text{CH}_2\text{Cl}_2/n$ -hexane mixtures with different  $n$ -hexane fractions.

## 10. The $^1\text{H}$ , $^{31}\text{P}$ , and $^{13}\text{C}$ NMR spectra of TPA



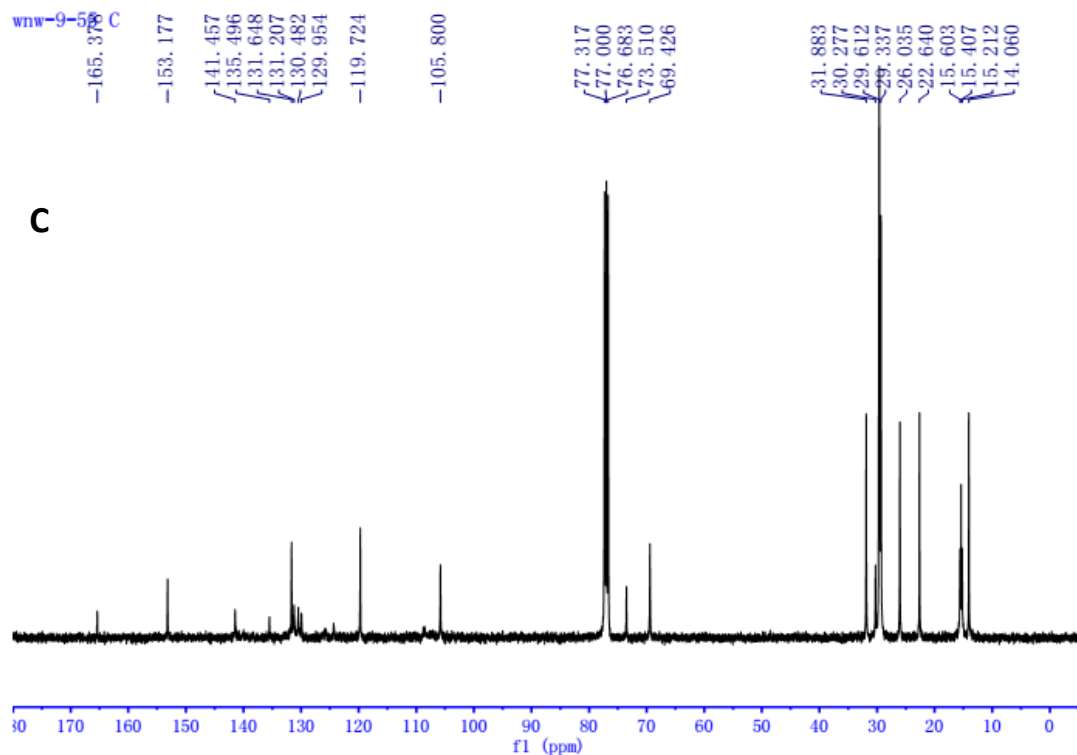

Fig. S8 The  $^1\text{H}$  NMR (a),  $^{31}\text{P}$  NMR (b), and  $^{13}\text{C}$  NMR (c) spectra of TPA in  $\text{CDCl}_3$ .

## 11. The partial $^{31}\text{P}$ NMR spectra of 2 and TPA

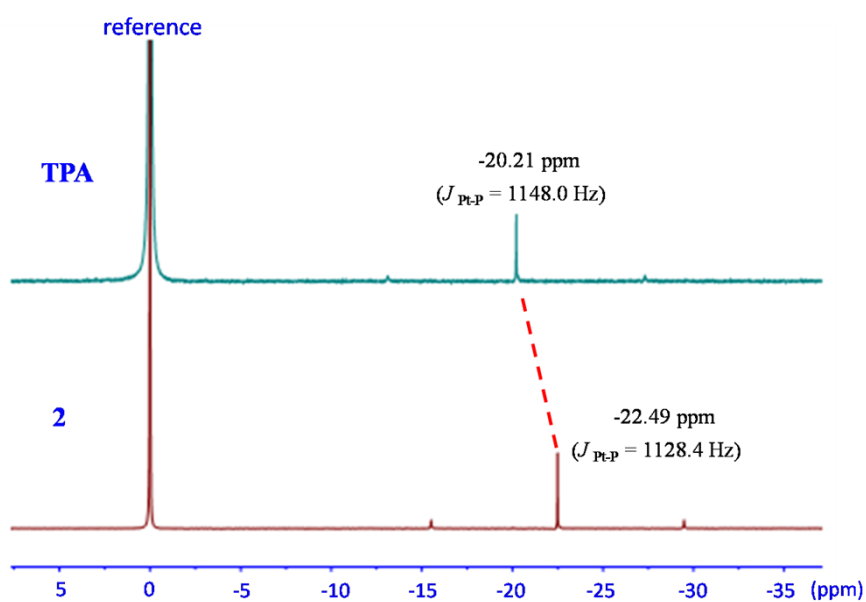

Fig. S9 The partial  $^{31}\text{P}$  NMR spectra of 2 and TPA in  $\text{CDCl}_3$ .

## 12. MALDI-TOF-MS of TPA

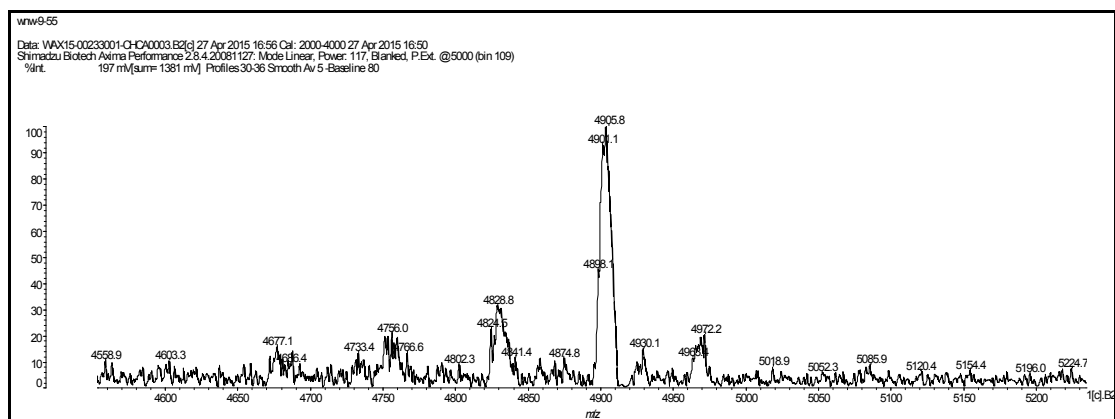

Fig. S10 MALDI-TOF-MS of TPA.

## 13. IR spectra of the xerogel TPA

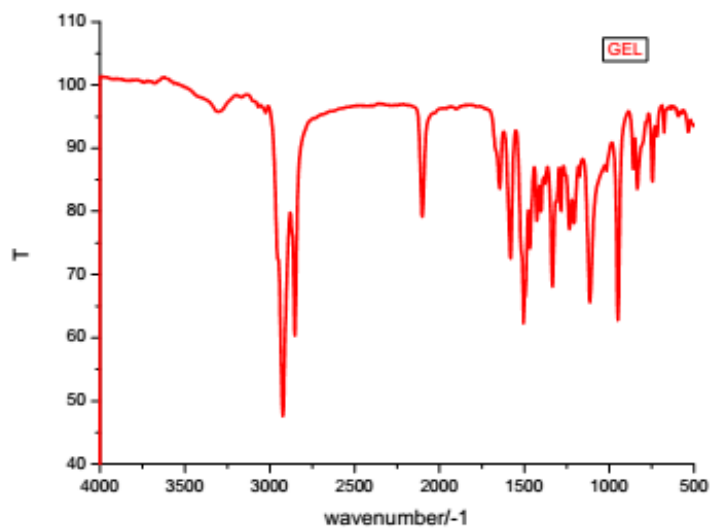

Fig. S11 IR spectra of the xerogel TPA.

## 14. X-ray diffraction diagrams of the xerogel TPA

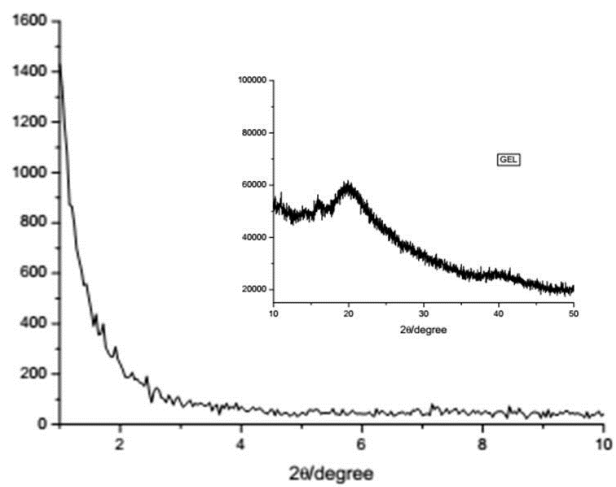

Fig. S12 X-ray diffraction diagrams of the xerogel **TPA**. The inset for the diffraction in wide-angle region.
